# Supplementary material
Source: PubMed Central journal article supplement (PMC3811629)
Supplement: JCM.00473-13_zjm999092826so1.pdf [file JCM.00473-13_zjm999092826so1.pdf]

## 1 **Supplemental Material**

### 2 **Gram staining**

3           The gram staining technique is used to differentiate prokaryotes into two groups  
4 based on differences in staining and form (i.e., rods and cocci) (1) . Gram-positive  
5 prokaryotes stain purple because their relatively impermeable cell wall contains a thick layer  
6 of peptidoglycan that retains crystal violet. In contrast, gram-negative prokaryotes have a thin  
7 peptidoglycan layer that does not retain crystal violet during decolorization; therefore, the  
8 cells are stained red (2). The archaeal cell wall does not contain peptidoglycan, and its  
9 envelope structure is very different from that of the eubacterial envelope (3). Gram stain  
10 results for archaeal cells are variable: some *Archaea*, such as *Methanospirillum bungatei*,  
11 stain gram-negative (3), whereas *Methanobrevibacter smithii*, *Methanosphaerae stadmanae*  
12 and *Methanomassiliicoccus lumnyiensis*, the 3 archaeal species that have been isolated from  
13 the human gut microbiota to date (4,5), stain gram-positive (6).

### 14 **Quantification by flow cytometry**

15           For flow cytometric analyses, the BD LSR Fortessa™ Cell Analyzer (Becton  
16 Dickinson, Franklin Lakes, NJ, USA) was used, equipped with 3 lasers (a 405 nm purple  
17 laser, a 488 nm blue laser and a 633 nm red laser). We quantified bacteria using a suspension  
18 of fluorescent microspheres (Cytocount™, DakoCytomation, Glostrup, Denmark) as a  
19 reference population.

### 20 **Transmission electron microscopy**

21           The samples were washed with PBS and fixed overnight in 2% glutaraldehyde in 0.1  
22 M cacodylate buffer. After washing 3 times in 0.1 M cacodylate buffer, the specimens were  
23 post-fixed in 1% OsO<sub>2</sub> in potassium ferricyanide (0.1 M) (7) for one hour, washed 3 times  
24 with a water solution and dehydrated in an ascending series of ethanol dilutions ranging from  
25 30% to 100%. Finally, the samples were submerged in Epon 815 resin (8). After

26 polymerization for 3 days, the blocks of resin containing the samples were cut using a  
27 microtome (a transversal cut was made, which is why differentiating between cocci and rods  
28 is not possible). Sections with a thickness of 70 nm were stained with 3.5% uranyl acetate and  
29 lead citrate before examination in a TEM Philips Morgagni™ 268(D) (FEI, Hillsboro,  
30 Oregon) at 60 kV.

### 31 **16S rDNA pyrosequencing**

32 In the first case, the forward and reverse primers were designated 454A\_917F  
33 (CGTATCGCCTCCCTCGCGCCATCAGGAATTGACGGGGRCCC)

34 and 454B\_1391R (CTATGCGCCTTGCCAGCCCGCTCAGGACGGGCGGTGWGTRCA).

35 The 13 others samples were amplified to allow unidirectional sequencing using the following  
36 forward and reverse primers:

37 ShotA\_917F (CCATCTCATCCCTGCGTGTCTCCGACTCAGGAATTGACGGGGRCCC)

38 and

39 ShotB\_1391R (CCTATCCCCTGTGTGCCTTGGCAGTCTCAGGACGGGCGGTGWGTRC

40 A), respectively. For both approaches, the amplicon library consisted of a simple PCR

41 reaction using 1 µl of the DNA template extracted as described above and a pair of special

42 fusion primers consisting of two parts. The PCR reactions were performed in 20 µL reaction

43 volumes and used 30 cycle reactions with Taq Phusion (Finnzymes, Thermo Scientific,

44 Waltham, MA, USA). The PCR reagents and thermocycling parameters were those suggested

45 in the protocol suggested for the Taq Phusion enzyme (optimal annealing temperature of

46 60°C, an elongation time of 30 sec at 72°C for 20 cycles and a final elongation time of 10 min

47 at 72°C). The amplicon lengths (544 bp) were visualized using the BioAnalyzer DNA labchip

48 7500. The amplicons were purified as recommended using Ampure beads (Agencourt) and

49 were quantified using a Tecan Genios fluorometer according to the manufacturer's

50 instructions (procedure 454\_Roche, "The Amplicon Library Preparation Method Manual").

51 Three bidirectional libraries were clone-amplified with 1 cpb in a 1 cup emPCR reaction  
52 using the GS Titanium LV emPCR Kit (Lib-A) v2 for each sample, and the 13 unidirectional  
53 libraries were amplified with 1.5 cpb using the GS Titanium LV emPCR Kit (Lib-L). Each  
54 project was loaded onto one half of a GS Titanium PicoTiterPlate PTP Kit 70x75 and  
55 sequenced with the GS Titanium Sequencing Kit XLR70. The sequence (355 Mb) was  
56 generated as it passed the filter sequences with an average read length of 283 bp.

### 57 **16S ribosomal RNA copy number correction**

58 The number of 16S rDNA gene copies is used as a measure of microbial population  
59 abundance and diversity (9), varying from one to 15 copies in different bacteria (10). To  
60 compare the employed pyrosequencing technique with the employed morphological tools  
61 (gram staining and TEM) without introducing molecular bias, we corrected the number of  
62 reads obtained from the major phyla (*Bacteroidetes*, *Firmicutes*, *Actinobacteria*,  
63 *Proteobacteria* and *Verrucomicrobia*) by pyrosequencing using the mean number of 16S  
64 rDNA gene copies for these phyla. We selected bacterial species composing the human gut  
65 microbiota from the Human Microbiome Project catalogue (<http://www.hmpdacc.org>) based  
66 only on previous studies (11, 12) in which the entire genome had been sequenced. We used  
67 the Gold database (13) and the NCBI genome and gene databases  
68 (<http://www.ncbi.nlm.nih.gov/genome>) to analyze the complete sequenced genome and assess  
69 the 16S rDNA copy number for each species selected. We then divided the concentration for  
70 each phylum, as indicated by the number of reads obtained by pyrosequencing, by the mean  
71 number of 16S rDNA gene copies of each phylum and compared the results with  
72 quantifications obtained using gram staining and TEM. Unidentified reads were divided by  
73 the mean number of 16S rDNA gene copies from the *Bacteroidetes*, *Firmicutes*,  
74 *Actinobacteria*, *Proteobacteria* and *Verrucomicrobia* phyla.

### 75 **Quantification of Gram-negative and gram-positive prokaryotes per gram of feces**

76 For each sample, the quantity of gram-negative and gram-positive prokaryotes per gram of  
77 feces was calculated by multiplying the percentage of gram-negative or gram-positive  
78 prokaryotes obtained using each technique (i.e., the number of cells counted using gram  
79 staining and TEM and the number of reads assigned to each phylum using pyrosequencing)  
80 by the total prokaryote concentration obtained using flow cytometry. For quantitative PCR,  
81 the concentrations of *Bacteroidetes*, *Firmicutes* and *Methanobrevibacter smithii* were  
82 calculated using the concentration of chimeric plasmid. In addition, the quantifications of  
83 gram-positive bacteria that were obtained by ram staining and TEM were corrected using *M.*  
84 *smithii* concentrations obtained using quantitative PCR. The quantifications of bacteria in the  
85 *Firmicutes*, *Bacteroidetes*, *Proteobacteria*, *Actinobacteria* and *Verrucomicrobia* phyla that  
86 were obtained by pyrosequencing were normalized to the mean 16S rDNA copy number **to**  
87 **compare with TEM**, while no correction was made for the quantifications of bacteria in the  
88 *Bacteroidetes* and *Firmicutes* phyla that were obtained by comparing pyrosequencing data  
89 with the qPCR results.

90

91

- 92 1. **Gregersen T.** (1978) Rapid Method for Distinction of Gram-Negative from Gram-  
93 positive Bacteria. *European J Appl Microbiol Biotechnol.* **5**: 123-127.
- 94 2. **Beveridge TJ.** (1990). Mechanism of gram variability in select bacteria. *J Bacteriol.*  
95 **172**: 1609-1620.
- 96 3. **Beveridge TJ, Schultze-Lam S.** (1996). The response of selected members of the  
97 archaea to the gram stain. *Microbiology* 142 ( Pt 10): 2887-2895.
- 98 4. **Dridi B, Henry M, El Khéchine A, Raoult D, Drancourt M.** (2009). High prevalence  
99 of *Methanobrevibacter smithii* and *Methanosphaera stadtmanae* detected in the  
100 human gut using an improved DNA detection protocol. *PLoS One.* **4**: e7063.  
101 10.1371/journal.pone.0007063 (doi).
- 102 5. **Dridi B, Fardeau ML, Ollivier B, Raoult D, Drancourt M.** (2012).  
103 *Methanomassiliicoccus luminyensis* gen. nov., sp. nov., a methanogenic  
104 archaeon isolated from human faeces. *Int J Syst Evol Microbiol.* **62**: 1902-1907.  
105 ijs.0.033712-0 (pii);10.1099/ijs.0.033712-0 (doi).

- 106 6. **Boone DR, Whitman WB.** (2008). Proposal of Minimal Standards for Describing New  
107 Taxa of Methanogenic Bacteria. *International Journal of Systematic*  
108 *Bacteriology*. **38**: 212-219.
- 109 7. **Robinson DG.** (1987). *Methods for preparation of electron microscopy.* Springer  
110 Verlag .
- 111 8. **Richardson KC, Jarrett L, Finke EH.** (1960). Embedding in epoxy resins for ultrathin  
112 sectioning in electron microscopy. *Stain Technol.* **35**: 313-323.
- 113
- 114 9. **Pei AY, Oberdorf WE, Nossa CW, Agarwal A, Chokshi P, Gerz EA, Jin Z, Lee P,**  
115 **Yang L, Poles M, Brown SM, Sotero S, Desantis T, Brodie E, Nelson K, Pei**  
116 **Z.** (2010). Diversity of 16S rDNA genes within individual prokaryotic genomes.  
117 *Appl Environ Microbiol.* **76**: 3886-3897. AEM.02953-09  
118 (pii);10.1128/AEM.02953-09 (doi).
- 119 10. **Kembel SW, Wu M, Eisen JA, Green JL.** (2012). Incorporating 16S Gene Copy  
120 Number Information Improves Estimates of Microbial Diversity and Abundance.  
121 *PLoS Comput Biol.* **8**: e1002743. 10.1371/journal.pcbi.1002743  
122 (doi);PCOMPBIOL-D-12-00671 (pii).
- 123 11. **Qin J, Li R, Raes J, Arumugam M, Burgdorf KS, Manichanh C, Nielsen T, Pons N,**  
124 **Levenez F, Yamada T, Mende DR, Li J, Xu J, Li S, Li D, Cao J, Wang B,**  
125 **Liang H, Zheng H, Xie Y, Tap J, Lepage P, Bertalan M, Batto JM, Hansen**  
126 **T, Le Paslier D, Linneberg A, Nielsen HB, Pelletier E, Renault P, Sicheritz-**  
127 **Ponten T, Turner K, Zhu H, Yu C, Li S, Jian M, Zhou Y, Li Y, Zhang X, Li**  
128 **S, Qin N, Yang H, Wang J, Brunak S, Doré J, Guarner F, Kristiansen K,**  
129 **Pedersen O, Parkhill J, Weissenbach J; MetaHIT Consortium, Bork P,**  
130 **Ehrlich SD, Wang J.** (2010). A human gut microbial gene catalogue established  
131 by metagenomic sequencing. *Nature.* **464**(7285):59-65.10.1038/nature08821  
132 (doi)
- 133 12. **Eckburg PB, Bik EM, Bernstein CN, Purdom E, Dethlefsen L, Sargent M, Gill SR,**  
134 **Nelson KE, Relman DA.** (2005). Diversity of the human intestinal microbial  
135 flora. **308**(5728):1635-8.
- 136 13. **Bernal A, Ear U, Kyrpides N.** (2001). Genomes OnLine Database (GOLD): a monitor  
137 of genome projects world-wide. *Nucleic Acids Res.* **29**: 126-127.
- 138 14. **Chatterjee D.** (1997). The mycobacterial cell wall: structure, biosynthesis and sites of  
139 drug action. *Curr Opin Chem Biol.* **1**: 579-588. S1367-5931(97)80055-5 (pii).
- 140 15. **Amako K, Takade A, Taniai H, Yoshida S.** (2008). Electron microscopic examination  
141 of uncultured soil-dwelling bacteria. *Microbiol Immunol.* **52**: 265-269. MIM037  
142 (pii);10.1111/j.1348-0421.2008.00037.x (doi).
- 143

## Supplementary Figures and Tables

**TABLE S1.** Patient origins and characteristics.

| Sample number | SRA number | Sex | Age | Geographical origin        | Weight (kg) | BMI (kg/m <sup>2</sup> ) | Diseases             | Antibiotics                                                                                                          |
|---------------|------------|-----|-----|----------------------------|-------------|--------------------------|----------------------|----------------------------------------------------------------------------------------------------------------------|
| 1             | SRS385004  | M   | 49  | French Polynesia = Raiatea | 84          | 27,4                     | Overweight<br>Morbid | No                                                                                                                   |
| 2             | SRA049748  | F   | 26  | France                     | 120         | 48,2                     | obesity<br>Anorexia  | No                                                                                                                   |
| 3             | SRA062687  | F   | 20  | France                     | 27,7        | 10,4                     | nervosa              | No                                                                                                                   |
| 4             | SRA058885  | F   | 47  | France                     | NA          | NA                       | ICU 3 months         | piperacillin tazobactam, cefotaxime, ceftazidime, amoxicillin, clavulanic acid, ertapenem, caspofungin, voriconazole |
| 5             | SRA058885  | M   | 62  | France                     | NA          | NA                       | ICU 10 days          | imipenem                                                                                                             |
| 6             | SRA062846  | M   | 32  | France                     | 80          | 25,2                     | HIV Type 1           | No                                                                                                                   |
| 7             | SRS387496  | M   | 44  | French Polynesia           | 103,0       | 33,0                     | Obesity              | No                                                                                                                   |
| 8             | SRS387497  | M   | 46  | French Polynesia           | 111,0       | 31,0                     | Obesity              | No                                                                                                                   |
| 9             | SRS387498  | M   | 65  | French Polynesia           | 65,0        | 24,0                     | Overweight           | No                                                                                                                   |
| 10            | SRS387488  | F   | 72  | France                     | NA          | NA                       | HIV Type 1           | No                                                                                                                   |
| 11            | SRS387489  | M   | 57  | France                     | NA          | NA                       | HIV Type 2           | No                                                                                                                   |
| 12            | SRS387490  | M   | 42  | France                     | NA          | NA                       | HIV Type 1           | No                                                                                                                   |
| 13            | SRS387491  | M   | 32  | France                     | NA          | NA                       | HIV Type 1           | No                                                                                                                   |
| 14            | SRS385014  | M   | 46  | France                     | NA          | NA                       | HIV Type 1           | No                                                                                                                   |
| 15            | SRS387493  | M   | 44  | France                     | NA          | NA                       | HIV Type 1<br>Elite  | No                                                                                                                   |
| 16            | SRS387495  | F   | 23  | France                     | NA          | NA                       | Controller           | No                                                                                                                   |

**TABLE S2.** Primers and probes used for quantitative real-time PCR.

&gt;f: Forward primer

&gt;r: Reverse primer

| Phylum                            | Target gene | Amplicon length (bp) | Primer                                                             | Probe                         |
|-----------------------------------|-------------|----------------------|--------------------------------------------------------------------|-------------------------------|
| <i>Firmicutes</i>                 | 16S rRNA    | 179                  | > <b>f</b> GTCAGCTCGTGTGTCGTGA<br>> <b>r</b> CCATTGTAKYACGTGTGT    | <i>GTCAANTCATCATGCC</i>       |
| <i>Bacteroidetes</i>              | 16S rRNA    | 184                  | > <b>f</b> AGCAGCCGCGGTAAT<br>> <b>r</b> CTAHGCATTTACCCGCTA        | <i>GGGTTTAAAGGG</i>           |
| <i>Methanobrevibacter smithii</i> | 16S rRNA    | 123                  | > <b>f</b> CCGGGTATCTAATCCGGTTC<br>> <b>r</b> CTCCCAGGGTAGAGGTGAAA | <i>CCGTCAGAATCGTTCCAGTCAG</i> |

**TABLE S3.** Quantification of prokaryotes obtained using the Kovalslide and flow cytometry methods for 16 samples at a dilution of  $10^{-4}$  (**A**). Quantification of prokaryotes obtained from 10 control stool samples at 3 different dilutions ( $10^{-4}$  to  $10^{-6}$ ) (**B**).

**A**

|             | Count/g wet weight<br>(Kovalslide) | Count/g wet weight<br>(Cytometry) |
|-------------|------------------------------------|-----------------------------------|
| 1           | 3,10E+10                           | 1,49E+11                          |
| 2           | 1,80E+10                           | 3,21E+10                          |
| 3           | 1,40E+10                           | 2,83E+10                          |
| 4           | 1,40E+10                           | 2,61E+09                          |
| 5           | 1,40E+10                           | 6,12E+09                          |
| 6           | 2,00E+10                           | 4,60E+10                          |
| 7           | 2,20E+10                           | 3,28E+10                          |
| 8           | 9,60E+10                           | 1,50E+10                          |
| 9           | 1,50E+10                           | 3,10E+10                          |
| 10          | 2,00E+10                           | 8,18E+09                          |
| 11          | 2,20E+10                           | 1,90E+10                          |
| 12          | 1,50E+10                           | 9,04E+09                          |
| 13          | 9,90E+09                           | 1,52E+10                          |
| 14          | 2,00E+10                           | 1,04E+10                          |
| 15          | 6,30E+09                           | 7,33E+09                          |
| 16          | 9,90E+09                           | 2,99E+10                          |
| <i>Mean</i> | 2,17E+10                           | 2,76E+10                          |
| <i>SD</i>   | 2,07E+10                           | 3,47E+10                          |

**B**

|             | <i>1/10000</i> |          | <i>1/100000</i> |          | <i>1/1000000</i> |          |
|-------------|----------------|----------|-----------------|----------|------------------|----------|
|             | KovaS          | Cyto     | KovaS           | Cyto     | KovaS            | Cyto     |
| A           | 6,39E+10       | 8,90E+10 | 8,10E+10        | 1,17E+11 | 9,00E+10         | 2,28E+11 |
| B           | 8,10E+10       | 5,01E+10 | 9,90E+10        | 5,16E+10 | 9,00E+10         | 1,17E+11 |
| C           | 6,39E+10       | 5,62E+09 | 4,50E+10        | 1,22E+10 | 9,00E+10         | 3,63E+10 |
| D           | 6,93E+10       | 2,03E+10 | 8,10E+10        | 3,11E+10 | 9,00E+10         | 4,66E+10 |
| E           | 3,15E+10       | 1,48E+10 | 7,20E+10        | 5,67E+10 | 9,00E+10         | 1,72E+11 |
| F           | 8,55E+10       | 9,11E+10 | 9,00E+10        | 1,87E+11 | 9,00E+10         | 3,58E+10 |
| G           | 4,77E+10       | 6,61E+10 | 6,30E+10        | 8,90E+10 | 9,00E+10         | 3,67E+11 |
| H           | 6,75E+10       | 4,12E+10 | 5,40E+10        | 7,63E+10 | 9,00E+10         | 3,94E+11 |
| I           | 3,87E+10       | 2,36E+10 | 8,10E+10        | 6,18E+10 | 9,00E+10         | 5,68E+11 |
| J           | 3,87E+10       | 3,76E+10 | 7,20E+10        | 2,70E+11 | 9,00E+10         | 1,02E+12 |
| <i>Mean</i> | 5,88E+10       | 4,39E+10 | 7,38E+10        | 9,52E+10 | 9,00E+10         | 2,98E+11 |
| <i>SD</i>   | 1,86E+10       | 3,00E+10 | 1,63E+10        | 7,84E+10 | 0,00E+00         | 3,08E+11 |



**TABLE S4.** The 16S rDNA copy numbers for *Firmicutes*, *Bacteroidetes*, *Actinobacteria*, *Proteobacteria* and *Verrucomicrobia* (A). The 16S rDNA copy numbers for *Methanobrevibacter smithii* obtained using quantitative PCR (B).

A

|                                                                        | 16S rDNA copy number |
|------------------------------------------------------------------------|----------------------|
| <b><i>Firmicutes</i></b>                                               |                      |
| <i>Eubacterium rectale</i> 33656                                       | 5                    |
| <i>Enterococcus faecalis</i>                                           | 4                    |
| <i>E. faecium</i>                                                      | 6                    |
| <i>Lactobacillus reuteri</i>                                           | 6                    |
| <i>L. rhamnosus</i>                                                    | 5                    |
| <i>Clostridium perfringens</i>                                         | 8                    |
| <i>C.difficile</i> CD196                                               | 10                   |
| <i>Veillonella parvula</i>                                             | 4                    |
| <i>Ruminococcus albus</i>                                              | 4                    |
| <i>E. eligens</i>                                                      | 5                    |
| <b><i>Bacteroidetes</i></b>                                            |                      |
| <i>Bacteroides vulgatus</i>                                            | 7                    |
| <i>B. thetaiotaomicron</i> VPI-5482                                    | 5                    |
| <i>Parabacteroides distasonis</i> ATCC 8503                            | 7                    |
| <i>B. fragilis</i> 638R                                                | 6                    |
| <i>Alistipes finegoldii</i>                                            | 2                    |
| <i>Prevotella melaninogenica</i>                                       | 4                    |
| <i>Odoribacter splanchnicus</i> DSM 20712                              | 4                    |
| <i>Porphyromonas gingivalis</i> ATCC 33277                             | 4                    |
| <b><i>Actinobacteria</i></b>                                           |                      |
| <i>Bifidobacterium adolescentis</i> ATCC 15703                         | 5                    |
| <i>B. bifidum</i>                                                      | 3                    |
| <i>B. breve</i> ACS-071-V-Sch8b                                        | 3                    |
| <i>B. longum</i> DJO10A                                                | 4                    |
| <i>B. animalis</i> subsp. <i>Lactis</i> AD011                          | 2                    |
| <i>Eggerthella lenta</i>                                               | 3                    |
| <i>Rothia mucilaginosa</i>                                             | 3                    |
| <i>Propionibacterium acnes</i>                                         | 2                    |
| <i>Atopobium parvulum</i>                                              | 1                    |
| <i>Clavibacter michiganensis</i> subsp. <i>michiganensis</i> NCPPB 382 | 2                    |
| <b><i>Verrucomicrobia</i></b>                                          |                      |
| <i>Akkermansia muciniphila</i> ATCC BAA-835                            | 3                    |
| <b><i>Proteobacteria</i></b>                                           |                      |
| <i>Escherichia Coli</i>                                                | 7                    |
| <i>Proteus mirabilis</i>                                               | 7                    |
| <i>Klebsiella pneumoniae</i>                                           | 8                    |
| <i>Helicobacter pylori</i>                                             | 2                    |
| <i>Enterobacter cloacae</i>                                            | 8                    |
| <i>Pseudomonas aeruginosa</i>                                          | 4                    |
| <i>Citrobacter koseri</i> ATCC BAA-895                                 | 7                    |
| <i>Haemophilus parainfluenzae</i>                                      | 6                    |
| <i>Edwardsiella tarda</i>                                              | 8                    |
| <i>Aeromonas veronii</i>                                               | 10                   |

**B**

| <i>M. smithii</i> |      |                |
|-------------------|------|----------------|
|                   | Ct   | Quantification |
| 1                 | 30,0 | 1,05E+06       |
| 2                 | 25,8 | 7,75E+06       |
| 3                 | 22,6 | 1,33E+09       |
| 4                 | 20,5 | 3,60E+08       |
| 5                 | 24,8 | 8,88E+08       |
| 6                 | 27,3 | 3,19E+06       |
| 7                 | 22,3 | 1,48E+08       |
| 8                 | 22,4 | 2,96E+08       |
| 9                 | 24,5 | 2,21E+07       |
| 10                | 25,7 | 8,32E+07       |
| 11                | 19,4 | 3,96E+08       |
| 12                | 25,6 | 2,34E+06       |
| 13                | 25,5 | 9,82E+06       |
| 14                | 17,2 | 2,28E+09       |
| 15                | 27,6 | 1,57E+07       |
| 16                | 19,6 | 1,85E+09       |

**TABLE S5.** The number of reads obtained for the 16 samples by pyrosequencing. (X) indicates the percentage of each phylum within a sample. The two most important phyla in each sample are indicated by bold typeface. Blue font indicates gram-positive phyla, and red font indicates gram-negative phyla.

| <i>Firmicutes</i>     | <i>Bacteroidetes</i> | <i>Actinobacteria</i> | <i>Proteobacteria</i> | <i>Fusobacteria</i> | <i>Deinococcus<br/>Thermus</i> | <i>Cyanobacteria<br/>Chloroplast</i> | <i>Verrucomicrobia</i> | <i>Synergistetes</i> | <i>Lentisphaerae</i> | <i>TM7</i>    | <i>Others</i>      | <b>TOTAL</b> |
|-----------------------|----------------------|-----------------------|-----------------------|---------------------|--------------------------------|--------------------------------------|------------------------|----------------------|----------------------|---------------|--------------------|--------------|
| 2364 (1,66)           | <b>74813 (52,64)</b> | 872 (0,61)            | <b>64082 (45,09)</b>  | 1 (0)               | 0                              | 0                                    | 0                      | 0                    | 0                    | 0             | 0                  | 142132       |
| <b>83261 (91,12)</b>  | 14 (0,02)            | 931 (1,02)            | <b>739 (0,81)</b>     | 0                   | 0                              | 2 (0)                                | 0                      | 0                    | 0                    | 4             | <b>6421 (7,03)</b> | 91372        |
| <b>64216 (76,49)</b>  | 4983 (5,94)          | <b>8439 (10,05)</b>   | 2434 (2,90)           | 1 (0)               | 0                              | 25 (0,03)                            | 2 (0)                  | 17 (0,02)            | 0                    | 0             | 3834 (4,57)        | 83951        |
| <b>47052 (78,54)</b>  | <b>5230 (8,73)</b>   | 1851 (3,09)           | 57 (0,10)             | 9 (0,02)            | 0                              | 0                                    | 1 (0)                  | 772 (1,29)           | 0                    | 0             | 4936 (8,24)        | 59908        |
| <b>968 (7,39)</b>     | 580 (4,43)           | 1 (0,01)              | 230 (1,76)            | 0                   | 0                              | 0                                    | <b>11280 (86,09)</b>   | 0                    | 0                    | 0             | 43 (0,33)          | 13102        |
| <b>58791 (49,07)</b>  | <b>56107 (46,84)</b> | 2165 (1,81)           | 1750 (1,46)           | 0                   | 0                              | 1 (0)                                | 39 (0,03)              | 0                    | 0                    | 0             | 938 (0,78)         | 119781       |
| <b>113331 (50,15)</b> | 432 (0,19)           | 42020(18,6)           | <b>69880 (30,93)</b>  | 2 (0)               | 0,0                            | 2 (0)                                | 0                      | 3 (0)                | 0                    | 103<br>(0,05) | 192 (0,08)         | 225965       |
| <b>76403 (72,57)</b>  | 7749 (7,36)          | <b>12448 (11,82)</b>  | 1235 (1,17)           | 0                   | 0,0                            | 0,00                                 | 5780 (5,49)            | 2 (0)                | 0                    | 0             | 1661 (1,58)        | 105278       |
| <b>63867 (40,75)</b>  | 1290 (0,82)          | 4687 (2,99)           | <b>86868 (55,42)</b>  | 0                   | 0,0                            | 1 (0)                                | 7 (0)                  | 1 (0)                | 0                    | 6 (0)         | 11 (0,01)          | 156738       |
| <b>35474 (76,92)</b>  | <b>5739 (12,44)</b>  | 207 (0,45)            | 1134 (2,46)           | 0                   | 0                              | 0                                    | 2762 (5,99)            | 0                    | 4 (0,01)             | 0             | 800 (1,73)         | 46120        |
| <b>32989 (80,68)</b>  | 1774 (4,30)          | 441 (1,08)            | <b>5217 (12,8)</b>    | 0                   | 0                              | 0                                    | 0                      | 0                    | 0                    | 1             | 467 (1,14)         | 40889        |
| <b>59476 (71,35)</b>  | 1867 (2,24)          | <b>16962 (20,35)</b>  | 3879 (4,65)           | 0                   | 0                              | 0                                    | 0                      | 0                    | 0                    | 7 (0,01)      | 1162 (1,39)        | 83353        |
| <b>188372 (87,15)</b> | 4443 (2,06)          | <b>11377 (5,26)</b>   | 662 (0,31)            | 1 (0)               | 0                              | 1 (0)                                | 0                      | 0                    | 0                    | 8 (0)         | 11258<br>(5,21)    | 216145       |
| <b>37427 (70,28)</b>  | 1294 (2,43)          | <b>4165 (7,82)</b>    | 1448 (2,72)           | 0                   | 0                              | 0                                    | 0                      | 79 (0,15)            | 8 (0,02)             | 1 (0)         | 8830<br>(16,58)    | 53252        |
| <b>121974 (83,06)</b> | <b>23925 (16,29)</b> | 195 (0,13)            | 713 (0,49)            | 2 (0)               | 0                              | 4 (0)                                | 0                      | 0                    | 0                    | 0             | 36 (0,02)          | 146849       |
| <b>9281 (80,49)</b>   | 84 (0,73)            | 474 (4,11)            | <b>1640 (14,22)</b>   | 0                   | 0                              | 0                                    | 16 (0,14)              | 0                    | 0                    | 0             | 36 (0,31)          | 11531        |

**TABLE S6.** Concentration of gram-positive (A) and gram-negative (B) prokaryotes obtained with each method.

A

|        | qPCR<br>( <i>Firmicutes</i> ) | Pyro<br>( <i>Firmicutes</i> ) <sup>2</sup> | Pyro<br>( <i>Firmicutes</i> ) <sup>1</sup> | Pyro (all gram +) <sup>1</sup> | Gram<br>staining | TEM      |
|--------|-------------------------------|--------------------------------------------|--------------------------------------------|--------------------------------|------------------|----------|
| 1      | 1,37E+08                      | 2,48E+09                                   | 4,35E+08                                   | 7,60E+08                       | 6,15E+10         | 7,61E+10 |
| 2      | 2,26E+12                      | 2,92E+10                                   | 5,13E+09                                   | 5,24E+09                       | 1,55E+10         | 1,41E+10 |
| 3      | 7,34E+11                      | 2,17E+10                                   | 3,80E+09                                   | 4,82E+09                       | 1,42E+10         | 1,83E+10 |
| 4      | 1,02E+11                      | 2,05E+09                                   | 3,60E+08                                   | 3,89E+08                       | 1,64E+09         | 1,72E+09 |
| 5      | 1,11E+08                      | 4,52E+08                                   | 7,93E+07                                   | 7,95E+07                       | 2,82E+09         | 4,99E+09 |
| 6      | 4,18E+11                      | 2,26E+10                                   | 3,96E+09                                   | 4,26E+09                       | 3,46E+10         | 2,90E+10 |
| 7      | 4,35E+10                      | 1,65E+10                                   | 2,89E+09                                   | 5,07E+09                       | 9,07E+09         | 2,41E+10 |
| 8      | 6,50E+10                      | 1,09E+10                                   | 1,91E+09                                   | 2,54E+09                       | 3,65E+09         | 1,17E+10 |
| 9      | 1,78E+10                      | 1,26E+10                                   | 2,21E+09                                   | 2,54E+09                       | 1,24E+10         | 2,20E+10 |
| 10     | 7,92E+11                      | 6,29E+09                                   | 1,10E+09                                   | 1,12E+09                       | 1,68E+09         | 5,40E+09 |
| 11     | 3,55E+11                      | 1,53E+10                                   | 2,69E+09                                   | 2,76E+09                       | 5,37E+09         | 1,41E+10 |
| 12     | 1,49E+11                      | 6,45E+09                                   | 1,13E+09                                   | 1,79E+09                       | 1,51E+09         | 6,87E+09 |
| 13     | 3,74E+11                      | 1,33E+10                                   | 2,33E+09                                   | 2,62E+09                       | 2,51E+09         | 1,21E+10 |
| 14     | 4,85E+11                      | 7,34E+09                                   | 1,29E+09                                   | 1,58E+09                       | 4,11E+09         | 1,05E+10 |
| 15     | 1,25E+10                      | 6,08E+09                                   | 1,07E+09                                   | 1,07E+09                       | 5,66E+09         | 4,92E+09 |
| 16     | 5,10E+10                      | 2,41E+10                                   | 4,22E+09                                   | 4,66E+09                       | 5,89E+09         | 2,37E+10 |
| Median | 1,26E+11                      | 1,17E+10                                   | 2,06E+09                                   | 2,54E+09                       | 5,51E+09         | 1,31E+10 |
| SD     | 5,68E+11                      | 8,65E+09                                   | 1,52E+09                                   | 1,75E+09                       | 1,58E+10         | 1,76E+10 |

<sup>1</sup>correction using 16S rDNA copy number<sup>2</sup> no correction using 16S rDNA copy number

**B**

|        | qPCR<br>( <i>Bacteroidetes</i> ) | Pyro<br>( <i>Bacteroidetes</i> ) <sup>2</sup> | Pyro<br>( <i>Bacteroidetes</i> ) <sup>1</sup> | Pyro (all gram -) <sup>1</sup> | Gram<br>staining | TEM      |
|--------|----------------------------------|-----------------------------------------------|-----------------------------------------------|--------------------------------|------------------|----------|
| 1      | 2,13E+08                         | 7,85E+10                                      | 1,60E+10                                      | 2,61E+10                       | 8,78E+10         | 7,31E+10 |
| 2      | 3,09E+09                         | 6,41E+06                                      | 1,31E+06                                      | 4,01E+07                       | 1,66E+10         | 1,80E+10 |
| 3      | 1,74E+09                         | 1,68E+09                                      | 3,43E+08                                      | 4,80E+08                       | 1,54E+10         | 1,13E+10 |
| 4      | 1,48E+09                         | 2,28E+08                                      | 4,66E+07                                      | 8,12E+07                       | 1,34E+09         | 1,25E+09 |
| 5      | 1,68E+08                         | 2,71E+08                                      | 5,53E+07                                      | 1,83E+09                       | 4,18E+09         | 2,02E+09 |
| 6      | 1,80E+10                         | 2,15E+10                                      | 4,40E+09                                      | 4,50E+09                       | 1,14E+10         | 1,75E+10 |
| 7      | 1,48E+08                         | 6,23E+07                                      | 1,27E+07                                      | 1,54E+09                       | 2,39E+10         | 8,86E+09 |
| 8      | 4,27E+08                         | 1,10E+09                                      | 2,25E+08                                      | 5,26E+08                       | 1,16E+10         | 3,60E+09 |
| 9      | 7,02E+07                         | 2,54E+08                                      | 5,18E+07                                      | 2,61E+09                       | 1,86E+10         | 8,98E+09 |
| 10     | 1,92E+09                         | 1,02E+09                                      | 2,08E+08                                      | 4,02E+08                       | 6,58E+09         | 2,86E+09 |
| 11     | 5,67E+08                         | 8,24E+08                                      | 1,68E+08                                      | 5,31E+08                       | 1,40E+10         | 5,31E+09 |
| 12     | 7,31E+08                         | 2,02E+08                                      | 4,13E+07                                      | 1,05E+08                       | 7,53E+09         | 2,17E+09 |
| 13     | 3,37E+08                         | 3,14E+08                                      | 6,41E+07                                      | 7,12E+07                       | 1,27E+10         | 3,20E+09 |
| 14     | 4,95E+09                         | 2,54E+08                                      | 5,18E+07                                      | 1,12E+08                       | 8,62E+09         | 2,19E+09 |
| 15     | 1,85E+09                         | 1,19E+09                                      | 2,44E+08                                      | 2,49E+08                       | 1,68E+09         | 2,42E+09 |
| 16     | 4,42E+09                         | 2,18E+08                                      | 4,46E+07                                      | 6,94E+08                       | 2,59E+10         | 8,08E+09 |
| Median | 1,10E+09                         | 2,93E+08                                      | 5,97E+07                                      | 5,03E+08                       | 1,22E+10         | 4,46E+09 |
| SD     | 4,40E+09                         | 1,99E+10                                      | 4,05E+09                                      | 6,40E+09                       | 2,02E+10         | 1,75E+10 |

<sup>1</sup>correction using 16S rDNA copy number

<sup>2</sup> no correction using 16S rDNA copy number

**Fig. S1.** Observation of prokaryotes by TEM: Gram-negative prokaryotes (A); Gram-positive prokaryotes (B); *Mycobacterium szulgai* (14) (C); bacteria with unique cell envelopes (15) (D).

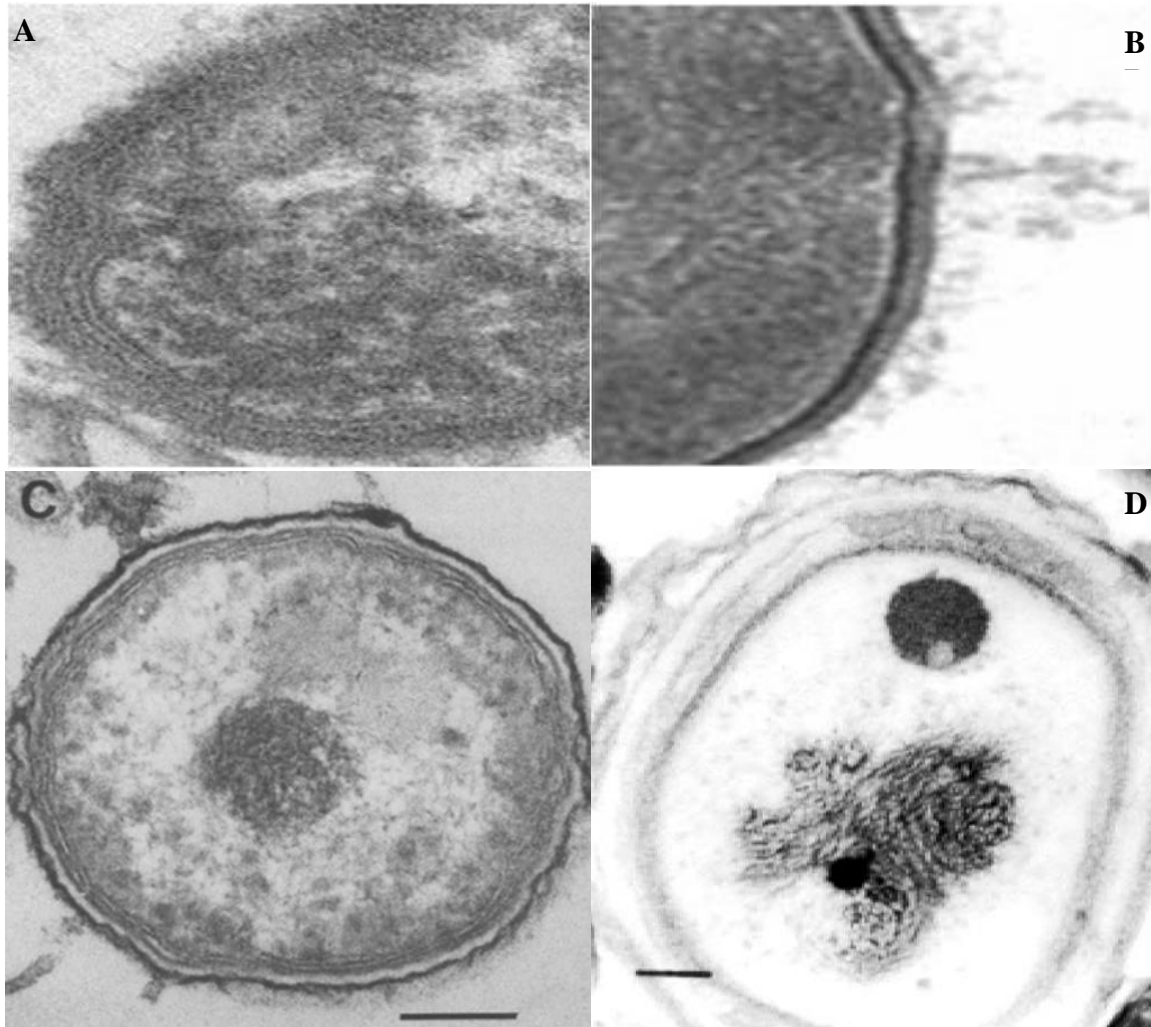

**Fig. S2.** Correlational analysis of the *Firmicutes* and *Bacteroidetes* concentrations obtained using qPCR and 454 FLX pyrosequencing (A). Correlational analysis of the prokaryote concentrations obtained using gram staining and TEM (B).

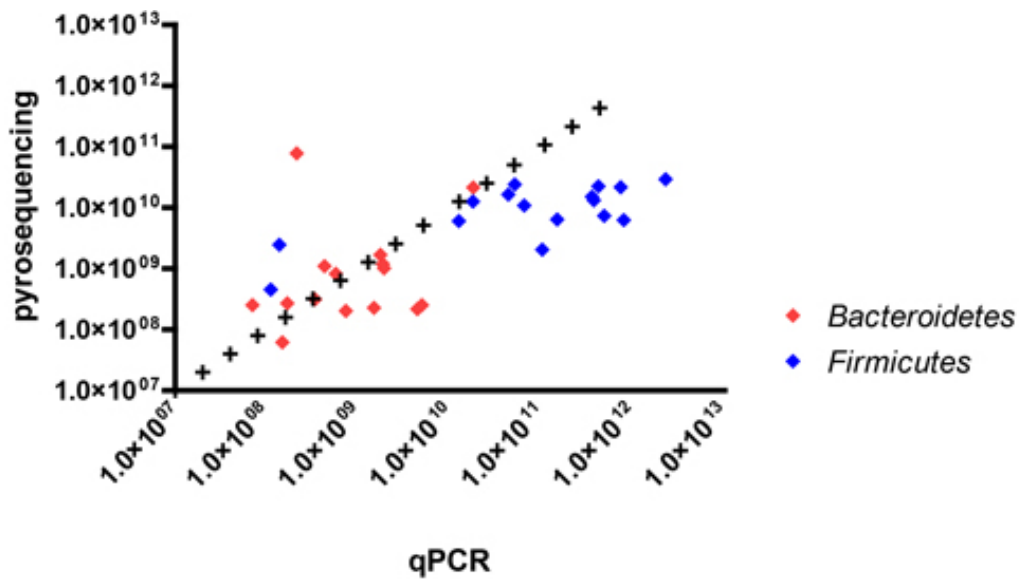

Spearman  $\rho = 0.4912$ ,  $p = 0.0534$  (*Firmicutes* concentration)  
 Spearman  $\rho = 0.05887$ ,  $p = 0.8286$  (*Bacteroidetes* concentration)

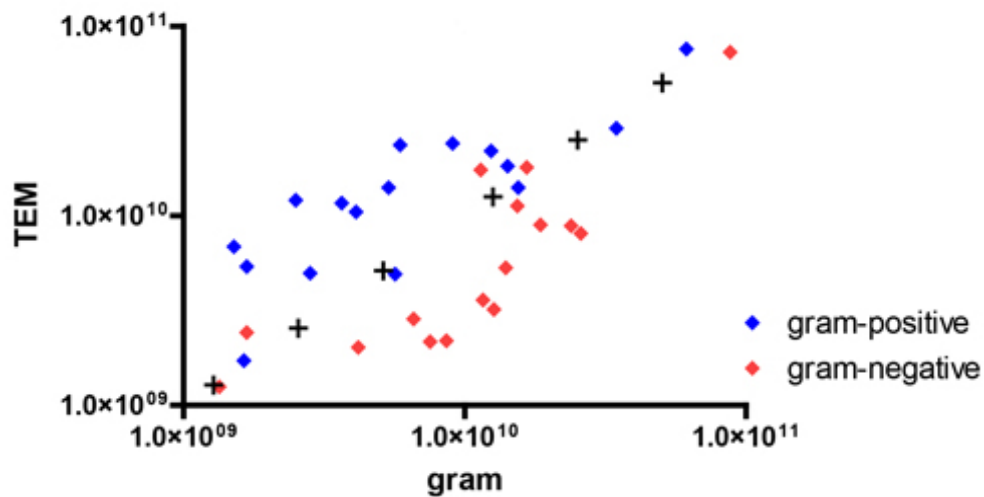

Spearman  $\rho = 0.8035$ ,  $p = 0.0002$  (gram-positive prokaryotes)  
 Spearman  $\rho = 0.8176$ ,  $p = 0.0001$  (gram-negative prokaryotes)
